# Supplementary material
Source: PubMed Central journal article supplement (PMC2323247)
Supplement: NIHMS37470-supplement-supplement.pdf [file NIHMS37470-supplement-supplement.pdf]

## Supplemental Data

### AGO1 Homeostasis Requires Coexpression of *MIR168* and *AGO1*, Posttranscriptional Stabilization of miR168 by *AGO1*, and miR168-Guided *AGO1* Cleavage

Hervé Vaucheret, Allison C. Mallory, and David P. Bartel

#### Supplemental Results

##### Plants Expressing an *AGO1* mRNA Perfectly Complementary to miR168 Exhibit Increased *AGO1* mRNA Cleavage but Develop Normally Due To Reduced miR168 Levels

To test further the biological relevance of our posttranscriptional autoregulatory model, we analyzed miRNA and *AGO1* levels in plants that express an *AGO1* mRNA perfectly complementary to miR168 (*Om-AGO1*) (Supplemental Figure 3A). To compare the cleavage efficiency of wild-type (*WT-AGO1*) and mutant (*Om-AGO1*) RNAs, we used an *in vitro* assay that relies on the endogenous miRNA-programmed RISC activity of wheat germ extract (Tang et al., 2003), knowing that miR168 is present in these extracts (Axtell and Bartel, 2005). The cleavage rate of a *Om-AGO1* RNA, which was generated by mutagenesis of an *AGO1* cDNA, was 2.5-fold faster than that observed for *WT-AGO1* RNA (Supplemental Figure 3B), indicating that the three native mismatches negatively impact the efficiency of miRNA-directed mRNA cleavage *in vitro*.

To analyze the impact of increased *AGO1* mRNA cleavage on plant development and miRNA accumulation, the same mutagenesis was performed on an 8-kb *AGO1* genomic fragment that contains all the upstream and downstream regulatory elements required for wild-type *AGO1* function (Vaucheret et al., 2004). We separately introduced the *WT-AGO1* and *Om-AGO1* constructs into the *ago1-1* null allele. This null allele contains a T-DNA that interrupts the endogenous *AGO1* gene, abolishing the production of *AGO1* mRNA, and that confers hygromycin resistance to the plant. Because homozygous *ago1-1* null alleles are sterile, we transformed fertile plants heterozygous for the *ago1-1* allele. Transformants that were kanamycin resistant, due to the presence of the *WT-AGO1* or *Om-AGO1* transgene, were first selected and the plants that did not exhibit an *AGO1* cosuppression phenotype (Vaucheret et al., 2004) were allowed to self-fertilize. Seeds collected from these plants were selected on hygromycin and the plants that produced 100% hygromycin-resistant progeny were identified as homozygous for *ago1-1*. The two *ago1-1::WT-AGO1* and three *ago1-1::Om-AGO1* plants that were identified exhibited a wild-type phenotype (data not shown), indicating that neither the increased cleavage rate of *AGO1* mRNA (Supplemental Figure 3B) nor the conservative E to D amino acid substitution generated by the abolition of the three native mismatches (Supplemental Figure 3A) substantially impacted plant development. One *ago1-1::WT-AGO1* and one *ago1-1::Om-AGO1* plant that appeared to carry the construct inserted at a single locus (i.e. primary transformants that segregated 3:1 kanamycin-resistant:kanamycin-sensitive progeny) were kept for further analyses. *AGO1* mRNA accumulated at ~two-fold lower level in the *ago1-1::Om-AGO1* plant compared with the *ago1-1::WT-AGO1* plant (Supplemental Figure 3C), consistent with the increased cleavage rate of *Om-AGO1* RNA observed *in vitro* (Supplemental Figure 3B). miR156 and miR160, which are representative of miRNAs that are insensitive to perturbation in *AGO1*, and miR165/166 and miR159, which are representative of miRNAs that are weakly sensitive to perturbation in *AGO1*, accumulation was equivalent in the *ago1-1::WT-AGO1* and *ago1-1::Om-AGO1* plants (Supplemental Figure 3D). In contrast, the accumulation of miR168 was almost two-fold lower in the *ago1-1::Om-AGO1* plant compared to the *ago1-1::WT-AGO1* plant, and this decreased accumulation of miR168 was not due to decreased transcription of the *MIR168* genes because the accumulation of the processed *MIR168a* loop was similar in the two plants (Supplemental Figure 3D). Rather, the decrease in the accumulation of miR168 likely was due to reduced *AGO1* mRNA (and *AGO1* protein) levels because of the increased cleavage efficiency of *Om-AGO1* mRNA, which is perfectly complementary to miR168. In this scenario, the new equilibrium between miR168 and *AGO1* levels maintained miRNA homeostasis and proper RISC functioning, consistent with the absence of developmental defects in *ago1-1::Om-AGO1* plants. These results support our model, in which a posttranscriptional regulatory loop involving *AGO1* and miR168 is required to maintain a proper balance of the miRNA pool and *AGO1* levels, which together control the mRNA levels of miRNA targets.

### **Supplemental References**

Tang, G., Reinhart, B. J., Bartel, D. P., and Zamore, P. D. (2003). A biochemical framework for RNA silencing in plants. *Genes Dev* *17*, 49-63.

Vaucheret, H., Vazquez, F., Crété, P., and Bartel, D. P. (2004). The action of *ARGONAUTE1* in the miRNA pathway and its regulation by the miRNA pathway are crucial for plant development. *Genes Dev* *18*, 1187-1197.

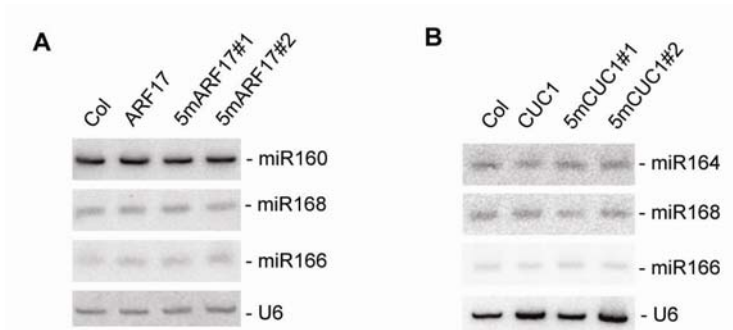

**Figure S1.** (A) miRNA accumulation in wild-type Col, a *ARF17* control and two individual *5m-ARF17* plants was determined by RNA gel blot analysis using 10  $\mu$ g of RNA extracted from rosette leaves. Blots were successively hybridized to different probes complementary to miRNAs and a probe complementary to U6 as a loading control. (B) miRNA accumulation in wild-type Col, a *CUC1* control and two individual *5m-CUC1* plants was determined by RNA gel blot analysis using 10  $\mu$ g of RNA extracted from rosette leaves. Blots were successively hybridized to different probes complementary to miRNAs and a probe complementary to U6 as a loading control.

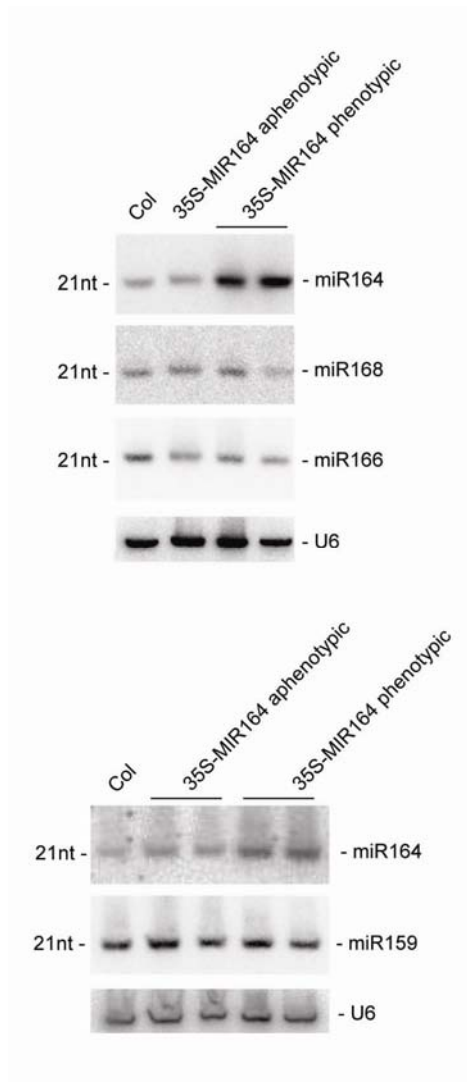

**Figure S2.** miRNA accumulation in wild-type Col, an aphenotypic 35S:MIR164b plant, and two individual 35S:MIR164b plants was determined by RNA gel blot analysis using 10  $\mu$ g of RNA extracted from floral inflorescence. Blots were successively hybridized to different probes complementary to miRNAs and a probe complementary to U6 as a loading control.

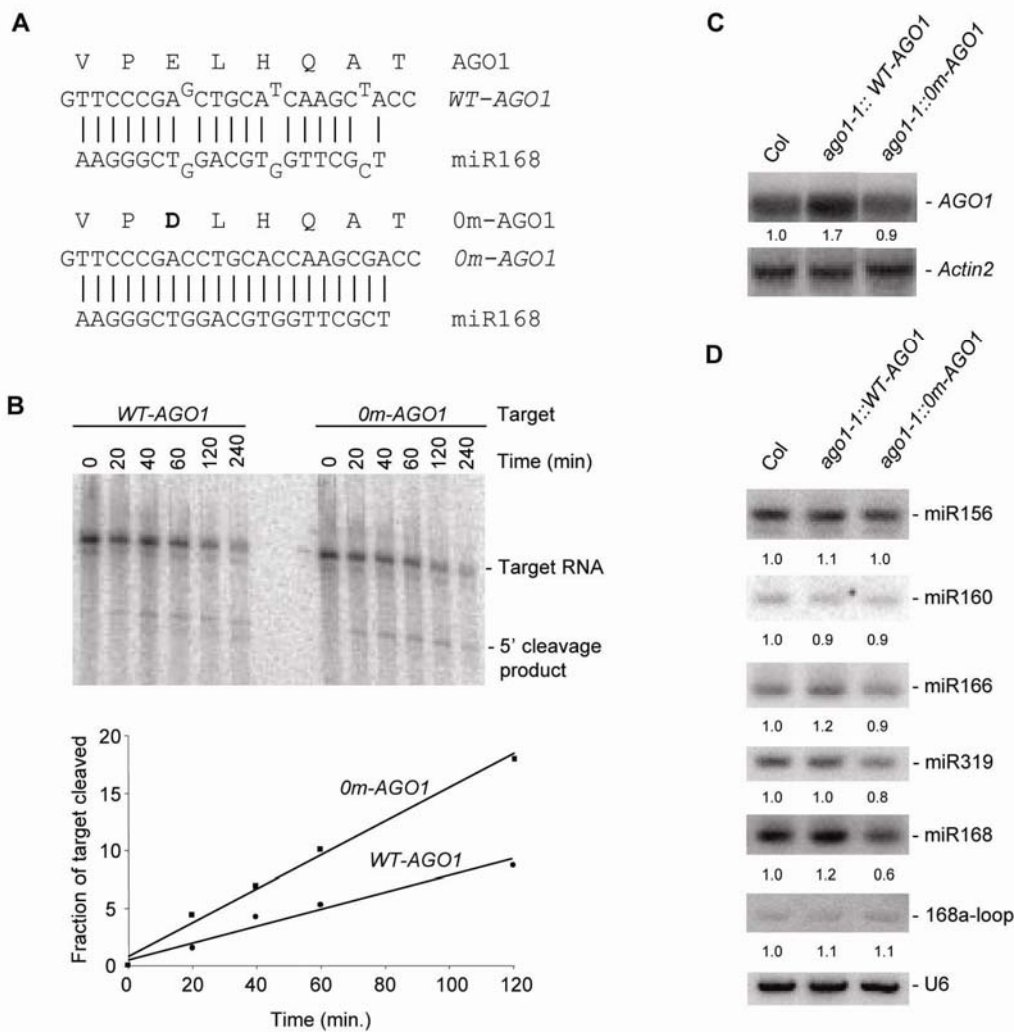

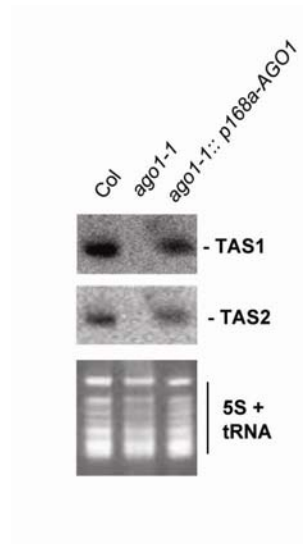

**Figure S4.** Expression of the *AGO1* cDNA under the control of the *MIR168a* promoter rescues the production of ta-siRNAs in null *ago1-1* alleles.

RNA gel blot analysis of 10  $\mu$ g of RNA with TAS1 and TAS2 probes. Ethidium bromide-stained 5S and tRNA are shown as a loading control.
